# Supplementary material for: Mutations in the interleukin receptor IL11RA cause autosomal recessive Crouzon-like craniosynostosis
Source: PubMed Central journal article supplement (PMC3865590; doi:10.1002/mgg3.28), 2013-08-19

A

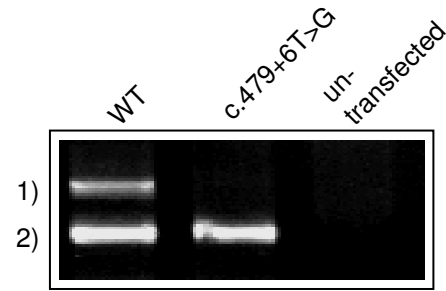

B

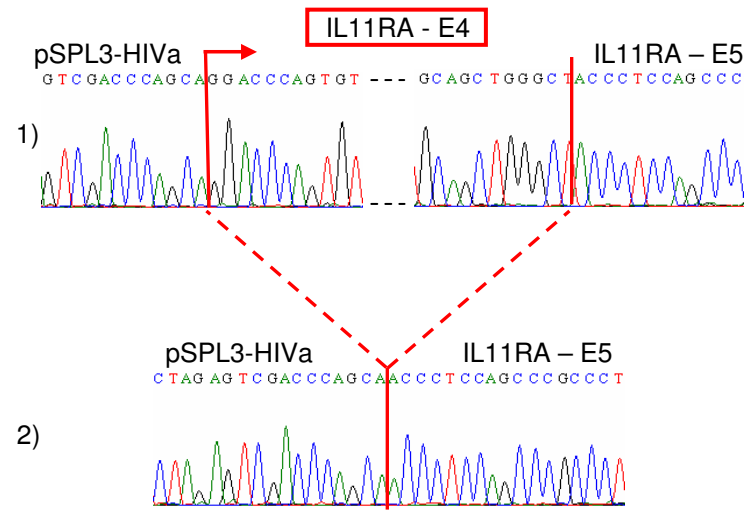

Supplement: mgg30001-0223-SD1.pdf [file mgg30001-0223-SD1.pdf]
